# Supplementary material for: Outcome measures for children with speech sound disorder: an umbrella review
Source: HighWire-hosted journal article supplement (doi:10.1136/bmjopen-2023-081446), 2024-04-01
Supplement: bmjopen-2023-081446supp001_data_supplement.pdf [file bmjopen-2023-081446supp001_data_supplement.pdf]

**Supplementary information 1:****OVID Medline**

- 1 (child\* or youth\* or boy\* or girl\* or juvenil\* or teenage\* or adolescen\* or "young person\*" or "young people\*" or toddler\* or infan\* or baby or babies).mp.
- 2 Child/ or Adolescent/ or Infant/ or Infant, Newborn/
- 3 1 or 2
- 4 (phon\* or speech or speech disorder\* or speech impairment\* or speech sound disorder\* or speech sound difficult\* or speech-sound\* or speech retard\* or speech delay\* or speech disabilit\* or speech handicap\* or speech problem\* or childhood apraxia of speech or apraxia of speech or developmental verbal dyspraxia or verbal dyspraxia or dyspraxia or articulat\*).ti,ab.
- 5 exp Speech Sound Disorder/
- 6 4 or 5
- 7 ("clinical service\*" or "therap\* service\*" or NHS or "social care" or "social service\*" or school\* or education\* or nurser\* or "early year\*" or preschool\* or pre-school\* or college\* or universit\*).mp.
- 8 Schools/ or Universities/ or Nurseries, Infant/ or Child, Preschool/ or Social Support/
- 9 7 or 8
- 10 (exp META-ANALYSIS AS TOPIC/ or ("meta analy\*" or "metaanaly\*").ti,ab. or META-ANALYSIS/ or (systematic adj1 (review\*1 or overview\*1)).ti,ab. or exp REVIEW LITERATURE AS TOPIC/ or (cochrane or embase or psychlit or psyclit or psychinfo or psycinfo or cinahl or cinhal or "science citation index" or bids or cancerlit).ab. or ("reference list\*" or bibliograph\* or hand-search\* or "relevant journals" or "manual search\*").ab. or (("selection criter\*" or "data extraction").ab. and exp REVIEW/)) not ((ANIMALS/ not (ANIMALS/ and exp HUMANS/)) and (COMMENT/ or LETTER/ or EDITORIAL/ or (letter\* or comment\*1 or editorial\*1).ti,ab.))
- 11 3 and 6 and 9 and 10
- 12 limit 11 to (english language and yr="2010 -Current")

**Ovid Embase**

Embase <1974 to 2022 September 14>

- 1 (child\* or youth\* or boy\* or girl\* or juvenil\* or teenage\* or adolescen\* or "young person\*" or "young people\*" or toddler\* or infan\* or baby or babies).mp.
- 2 Child/ or Adolescent/ or Infant/ or Infant, Newborn/
- 3 1 or 2

- 4 (phon\* or speech or speech disorder\* or speech impairment\* or speech sound disorder\* or speech sound difficult\* or speech-sound\* or speech retard\* or speech delay\* or speech disabilit\* or speech handicap\* or speech problem\* or childhood apraxia of speech or apraxia of speech or developmental verbal dyspraxia or verbal dyspraxia or dyspraxia or articulat\*).ti,ab.
- 5 exp Speech Sound Disorder/
- 6 4 or 5
- 7 ("clinical service\*" or "therap\* service\*" or NHS or "social care" or "social service\*" or school\* or education\* or nurser\* or "early year\*" or preschool\* or pre-school\* or college\* or universit\*).mp.
- 8 Schools/ or Universities/ or Nurseries, Infant/ or Child, Preschool/ or Social Support/
- 9 7 or 8
- 10 (exp META-ANALYSIS AS TOPIC/ or ("meta analy\*" or "metaanaly\*").ti,ab. or META-ANALYSIS/ or (systematic adj1 (review\*1 or overview\*1)).ti,ab. or exp REVIEW LITERATURE AS TOPIC/ or (cochrane or embase or psychlit or psyclit or psychinfo or psycinfo or cinahl or cinhal or "science citation index" or bids or cancerlit).ab. or ("reference list\*" or bibliograph\* or hand-search\* or "relevant journals" or "manual search\*").ab. or (("selection criter\*" or "data extraction").ab. and exp REVIEW/)) not ((ANIMALS/ not (ANIMALS/ and exp HUMANS/)) and (COMMENT/ or LETTER/ or EDITORIAL/ or (letter\* or comment\*1 or editorial\*1).ti,ab.))
- 11 3 and 6 and 9 and 10
- 12 limit 11 to (english language and yr="2010 -Current")

### Cochrane Database of Systematic Reviews

- #1 (child\* or youth\* or boy\* or girl\* or juvenil\* or teenage\* or adolescen\* or "young person\*" or "young people\*" or toddler\* or infan\* or baby or babies):ti,ab,kw
- #2 MeSH descriptor: [Child] explode all trees
- #3 MeSH descriptor: [Adolescent] explode all trees
- #4 MeSH descriptor: [Infant] explode all trees
- #5 MeSH descriptor: [Infant, Newborn] explode all trees
- #6 #1 or #2 or #3 or #4 or #5
- #7 (phon\* or speech or speech disorder\* or speech impairment\* or speech sound disorder\* or speech sound difficult\* or speech-sound\* or speech retard\* or speech delay\* or speech disabilit\* or speech handicap\* or speech problem\* or childhood apraxia of speech or apraxia of speech or developmental verbal dyspraxia or verbal dyspraxia or dyspraxia or articulat\*):ti,ab,kw

- #8 MeSH descriptor: [Speech Sound Disorder] explode all trees
- #9 #7 or #8
- #10 ("clinical service\*" or "therap\* service\*" or NHS or "social care" or "social service\*" or school\* or education\* or nurser\* or "early year\*" or preschool\* or pre-school\* or college\* or universit\*):ti,ab,kw
- #11 MeSH descriptor: [Schools] explode all trees
- #12 MeSH descriptor: [Universities] explode all trees
- #13 MeSH descriptor: [Nurseries, Infant] explode all trees
- #14 MeSH descriptor: [Social Support] explode all trees
- #15 MeSH descriptor: [Child, Preschool] explode all trees
- #16 #10 or #11 or #12 or #13 or #14 or #15
- #17 #6 and #9 and #16 with Cochrane Library publication date Between Jan 2010 and Dec 2022, in Cochrane Reviews

#### EBSCO CINAHL

- S1 (child\* or youth\* or boy\* or girl\* or juvenil\* or teenage\* or adolescen\* or "young person\*" or "young people\*" or toddler\* or infan\* or baby or babies)
- S2 (MH "Child") or (MH "Adolescence") or (MH "Infant") or (MH "Child, Preschool")
- S3 S1 OR S2
- S4 TI (phon\* or speech or speech disorder\* or speech impairment\* or speech sound disorder\* or speech sound difficult\* or speech-sound\* or speech retard\* or speech delay\* or speech disabilit\* or speech handicap\* or speech problem\* or childhood apraxia of speech or apraxia of speech or developmental verbal dyspraxia or verbal dyspraxia or dyspraxia or articulat\*) OR AB (phon\* or speech or speech disorder\* or speech impairment\* or speech sound disorder\* or speech sound difficult\* or speech-sound\* or speech retard\* or speech delay\* or speech disabilit\* or speech handicap\* or speech problem\* or childhood apraxia of speech or apraxia of speech or developmental verbal dyspraxia or verbal dyspraxia or dyspraxia or articulat\*)
- S5 (MH "Articulation Disorders, Organic") OR (MH "Articulation Disorders, Functional")
- S6 S4 OR S5
- S7 ("clinical service\*" or "therap\* service\*" or NHS or "social care" or "social service\*" or school\* or education\* or nurser\* or "early year\*" or preschool\* or pre-school\* or college\* or universit\*)
- S8 (MH "Schools") OR (MH "Colleges and Universities") OR (MH "Support, Psychosocial")

- S9 S7 OR S8
- S10 ("meta analy\*" or metaanaly\*) OR (MH "Meta analysis")
- S11 (systematic N1 (review\*1 OR overview\*1)) or (MH "Literature Review")
- S12 AB (cochrane OR embase OR psychlit OR psyclit OR psychinfo OR psycinfo OR cinahl OR cinhal OR "science citation index" OR bids OR cancerlit)
- S13 AB ("reference list\*" OR bibliograph\* OR hand-search\* OR "relevant journals" OR "manual search\*")
- S14 TI (("selection criter\*" OR "data extraction") AND review\*) NOT ((Commentary OR letter OR editorial) OR (letter\* OR comment\* OR editorial\*)) OR AB (("selection criter\*" OR "data extraction") AND review\*) NOT ((Commentary OR letter OR editorial) OR (letter\* OR comment\* OR editorial\*))
- S15 S10 OR S11 OR S12 OR S13 OR S14
- S16 S3 AND S6 AND S9 AND S15
- S17 S3 AND S6 AND S9 AND S15 Published Date: 20100101-20221231

### ProQuest PsycInfo

((TI,AB(child\* OR youth\* OR boy\* OR girl\* OR juvenil\* OR teenage\* OR adolescen\* OR "young person\*" OR "young people\*" OR toddler\* OR infan\* OR baby OR babies) AND TI,AB(phon\* OR speech OR speech disorder\* OR speech impairment\* OR speech sound disorder\* OR speech sound difficult\* OR speech-sound\* OR speech retard\* OR speech delay\* OR speech disabilit\* OR speech handicap\* OR speech problem\* OR childhood apraxia of speech OR apraxia of speech OR developmental verbal dyspraxia OR verbal dyspraxia OR dyspraxia OR articulat\*) AND (TI,AB("clinical service\*" OR "therap\* service\*" OR NHS OR "social care" OR "social service\*" OR school\* OR education\* OR nurser\* OR "early year\*" OR preschool\* OR pre-school\* OR college\* OR universit\*) OR MAINSUBJECT.EXACT("Schools") OR MAINSUBJECT.EXACT("Universities") OR MAINSUBJECT.EXACT("Nursery Schools") OR MAINSUBJECT.EXACT("Preschool Students")))) AND (TI,AB("meta analy\*" OR metaanaly\*) OR MAINSUBJECT.EXACT("Meta analysis") OR TI,AB(systematic NEAR/1 (review\* OR overview\*)) OR MAINSUBJECT.EXACT("Literature Review") OR AB(cochrane OR embase OR psychlit OR psyclit OR psychinfo OR psycinfo OR cinahl OR cinhal OR "science citation index" OR bids OR cancerlit) OR AB("reference list\*" OR bibliograph\* OR hand-search\* OR "relevant journals" OR "manual search\*") OR TI,AB(("selection criter\*" OR "data extraction") AND review\*) NOT ((Commentary OR letter OR editorial) OR (letter\* OR comment\* OR editorial\*)))) AND (la.exact("ENG") AND pd(20100101-20221231))
