# Supplementary material for: Outcome measures for children with speech sound disorder: an umbrella review
Source: HighWire-hosted journal article supplement (doi:10.1136/bmjopen-2023-081446), 2024-04-01
Supplement: bmjopen-2023-081446supp003_data_supplement.pdf [file bmjopen-2023-081446supp003_data_supplement.pdf]

Supplementary material 3: AMSTAR

|                    |      | Q1 | Q2 | Q3 | Q4 | Q5 | Q6 | Q7 | Q8 | Q9a | Q9b | Q10 | Q11a | Q11b | Q12 | Q13 | Q14 | Q15 | Q16 |
|--------------------|------|----|----|----|----|----|----|----|----|-----|-----|-----|------|------|-----|-----|-----|-----|-----|
| Baker and McLeod   | 2011 |    |    |    |    |    |    |    |    |     |     |     |      |      |     |     |     |     |     |
| Baker et al        | 2022 |    |    |    |    |    |    |    |    |     |     |     |      |      |     |     |     |     |     |
| Berkman et al      | 2020 |    |    |    |    |    |    |    |    |     |     |     |      |      |     |     |     |     |     |
| Crowe et al        | 2021 |    |    |    |    |    |    |    |    |     |     |     |      |      |     |     |     |     |     |
| Cunningham et al   | 2017 |    |    |    |    |    |    |    |    |     |     |     |      |      |     |     |     |     |     |
| Hearnshaw et al    | 2019 |    |    |    |    |    |    |    |    |     |     |     |      |      |     |     |     |     |     |
| Kaipa and Peterson | 2016 |    |    |    |    |    |    |    |    |     |     |     |      |      |     |     |     |     |     |
| Law et al          | 2005 |    |    |    |    |    |    |    |    |     |     |     |      |      |     |     |     |     |     |
| Lee et al          | 2015 |    |    |    |    |    |    |    |    |     |     |     |      |      |     |     |     |     |     |
| Masso et al        | 2014 |    |    |    |    |    |    |    |    |     |     |     |      |      |     |     |     |     |     |
| McCauley et al     | 2009 |    |    |    |    |    |    |    |    |     |     |     |      |      |     |     |     |     |     |
| Murray et al       | 2014 |    |    |    |    |    |    |    |    |     |     |     |      |      |     |     |     |     |     |
| Rodgers et al      | 2022 |    |    |    |    |    |    |    |    |     |     |     |      |      |     |     |     |     |     |
| Roulstone et al    | 2015 |    |    |    |    |    |    |    |    |     |     |     |      |      |     |     |     |     |     |
| Sugden et al       | 2016 |    |    |    |    |    |    |    |    |     |     |     |      |      |     |     |     |     |     |
| Sugden et al       | 2018 |    |    |    |    |    |    |    |    |     |     |     |      |      |     |     |     |     |     |
| Sugden et al       | 2019 |    |    |    |    |    |    |    |    |     |     |     |      |      |     |     |     |     |     |
| Wales et al        | 2017 |    |    |    |    |    |    |    |    |     |     |     |      |      |     |     |     |     |     |

Key: = Yes, = Partial Yes, = No, = Not applicable
